# Supplementary material for: Switching of electrochemical characteristics of redox protein upon specific biomolecular interactions
Source: Royal Society of Chemistry journal article supplement (doi:10.1039/c4an01591f), 2014-01-01
Supplement: c4an01591f1.pdf [file c4an01591f1.pdf]

## Switching of electrochemical characteristics of redox protein upon specific biomolecular interactions

Man Yi Ho<sup>†\*</sup>, Sarah Goodchild<sup>‡</sup>, Pedro Estrela<sup>†°</sup>, Daping Chu<sup>†</sup>,  
Piero Migliorato<sup>†</sup>

<sup>†</sup> Electrical Engineering Division, Engineering Department,  
University of Cambridge, Cambridge, CB3 0FA, UK

<sup>°</sup>Current address: Department of Electronic & Electrical Engineering,  
University of Bath, Bath BA2 7AY, UK

<sup>‡</sup>Defence Science and Technology Laboratory,  
Porton Down, Salisbury, SP4 0JQ, UK

# Supporting Information

---

## *Materials and Methods*

### 1 Sample preparation

#### Cleaning of bulk gold electrode

Gold disk working electrodes with radius 1mm (CH Instrument, Austin, TX, USA) were sonicated for 5 minutes in 3% decon, rinsed with deionised water (DI), followed by electrochemical reductive desorption in 0.5M NaOH from -0.9 to -1.9 V versus Hg/Hg<sub>2</sub>SO<sub>4</sub> until no further changes in the voltammogram were observed. The electrodes were then polished for 5 minutes with 0.3µm aluminium oxide powder (Buehler, Lake Bluff, IL, USA) on a polishing pad (Buehler). The residual powders were removed by sonicating in DI water for 5 minutes, polishing on a blank polishing pad, and finally sonicating again in DI water for another 5 minutes. Electrochemical cleaning in 0.5M H<sub>2</sub>SO<sub>4</sub> was performed by scanning the potential between -0.05V and +1.1V versus Hg/Hg<sub>2</sub>SO<sub>4</sub> for 55 cycles.

#### Electrode functionalization

Electrodes were incubated with 20µl of 20µg/ml biotinylated Az for 2 hours, followed by backfilling with 10µl of 100µM thiolated polyethylene glycol (PEG) S(CH<sub>2</sub>)<sub>11</sub>(OCH<sub>2</sub>CH<sub>2</sub>)<sub>3</sub>OH.

#### Specific interaction and control

For specific interaction, the functionalized electrodes were incubated with 20µl of 20µM streptavidin in 10mM pH7 phosphate buffer for 1 hour. As a control, electrodes were incubated with 10µg/ml Ovalbumin specific scFv antibody in PBS for 1 hour (provided by DSTL).

### 2 AC voltammetry measurement

Measurements were performed in a three-electrode cell, with Hg/Hg<sub>2</sub>SO<sub>4</sub> (K<sub>2</sub>SO<sub>4</sub> sat.) reference electrode and Pt counter electrode, using an Autolab PGSTAT302 potentiostat. The potential scan ranged from -0.45 V to 0.45V vs Hg/Hg<sub>2</sub>SO<sub>4</sub>. The amplitude and frequency of the superimposed rms signal were 10mV and 2Hz, respectively.

### 3 Electrochemical Impedance Spectroscopy (EIS) measurement

Measurements were performed in a three-electrode cell, with Hg/Hg<sub>2</sub>SO<sub>4</sub> (K<sub>2</sub>SO<sub>4</sub> sat.) reference electrode and Pt counter electrode, using an Autolab PGSTAT302 potentiostat. The measuring buffer contains 1mM K<sub>4</sub>[Fe(CN)<sub>6</sub>] + 1mM K<sub>3</sub>[Fe(CN)<sub>6</sub>] in phosphate buffer pH 7 for a range of ionic strength specified in the experiments. The impedance spectrum was measured from 0.1Hz to 10KHz, with 10mV ac potential superimposed on a dc bias potential equals to the formal potential of the redox couple ( -0.21V vs Hg/Hg<sub>2</sub>SO<sub>4</sub>). The charge transfer resistance, R<sub>ct</sub>, was determined by fitting the data to a Randles equivalent circuit.

### 4 Quartz crystal microbalance (QCM) measurement

The substrate of QCM was a gold-coated (mirror finish) 9MHz AT-cut quartz crystals with 2.5mm radius. In first approximation, neglecting any viscosity changes, the resonant frequency of the crystal changes with the mass loading according to the Sauerbrey equation:

$$\Delta_{\text{mass}} = \frac{-\Delta f \times A \times \sqrt{\mu_q \times \rho_q}}{2 \times F_q^2}$$

where  $\Delta_{\text{mass}}$  : Mass change  
 $\Delta f$  : Resonant frequency change  
 $\mu_q$  : AT-cut quartz crystal constant ( $2.947 \times 10^{11} \text{ g cm}^{-1} \text{ sec}^{-2}$ )  
 $\rho_q$  : Quartz crystal density ( $2.648 \text{ g cm}^{-3}$ )  
 $F_q$  : Reference frequency (9.00 MHz)  
 $A$  : Quartz crystal surface area ( $0.196 \text{ cm}^2$ )

QCM measurements were performed with QCA922 instrument from Princeton Applied Research. A 2.3ml Teflon cell was used. A magnetic stirrer was positioned in the cell to ensure proper mixing of the injected targets. However this mechanical vibration contributed noise to the measurement. A gold-coated crystal was held vertically in the cell to prevent non-specific deposition of biomolecules by gravitational forces. The quartz crystal was cleaned using acetone vapour and UV/ozone.

#### Immobilization of biotinylated Azurin

Figure 1 shows the real-time QCM measurement during biotinylated Azurin immobilization. A frequency change of 22Hz was observed, which corresponded to a change of mass of 23.5ng. The molecular weight of biotinylated Az is estimated to be 15.8kDa, yielding a coverage of  $4.6 \times 10^{12} \text{ cm}^{-2}$ .

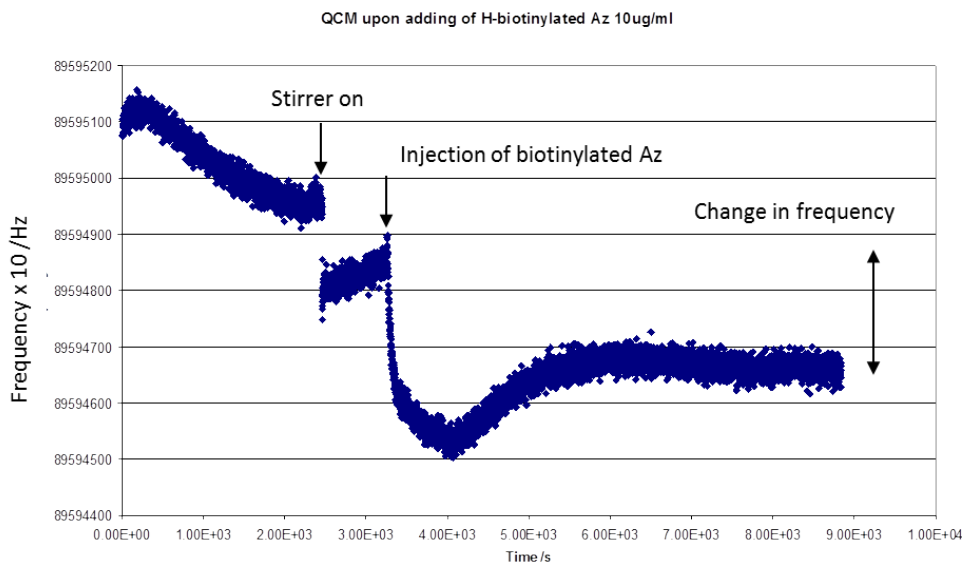

**Figure 1 QCM for immobilization of biotinylated Azurin**

## Reaction with Streptavidin

Figure 2 shows the QCM measurement for the reaction between biotinylated Az and Streptavidin. A frequency change of 9Hz was observed, which corresponded to a change of mass of 9.61ng. The molecular weight of biotinylated Az is estimated to be 60kDa, yielding a coverage of  $4.9 \times 10^{11} \text{ cm}^{-2}$ . The theoretical maximum coverage of streptavidin, given its size (5.5nm in diameter), is  $4.2 \times 10^{12} \text{ cm}^{-2}$ .

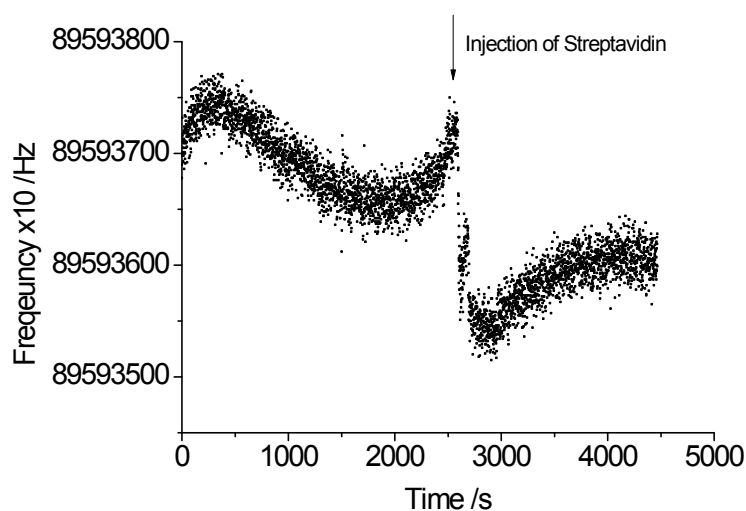

Figure 2 QCM for reaction of biotinylated Az with Streptavidin

5 Fitting parameters for several electrodes under different conditions:

- i) Biotinylated Azurin
- ii) Biotinylated Azurin after incubation with control
- iii) Biotinylated Azurin after incubation with streptavidin ( $\sigma > -(\sigma_M + \sigma_{PET})$ )

| Content         | Electrode | $(\sigma_M + \sigma_{PET}) / C$<br>$m^{-2}$ | $\sigma / C m^{-2}$ |
|-----------------|-----------|---------------------------------------------|---------------------|
| Biotinylated Az | 1         | 0.0269                                      | -0.0308             |
|                 | 2         | 0.0269                                      | -0.0296             |
|                 | 3         | 0.0268                                      | -0.0294             |
|                 | 4         | 0.0274                                      | -0.0330             |
| Antibody        | 5         | 0.0276                                      | -0.0287             |
|                 | 6         | 0.0269                                      | -0.0312             |
| Streptavidin    | 7         | 0.0271                                      | -0.0252             |
|                 | 8         | 0.0260                                      | -0.0218             |

Table 1 Fitting parameters for electrodes under different conditions
